# Supplementary material for: Quality Assessment of Systematic Review of the Bariatric Surgery for Diabetes Mellitus
Source: Hindawi journal article supplement (doi:10.1155/2019/9541638), 2019-11-21
Supplement: f1 [file 9541638.f1.pdf]

## Additional file 1: Search strategy

### Medline (N=1117)

- #1 "Perioperative Period"[Mesh]
- #2 "Perioperative Care"[Mesh]
- #3 "Surgical Procedures, Operative"[Mesh]
- #4 perioperative[Title/Abstract]
- #5 "peri-operative"[Title/Abstract]
- #6 preoperative[Title/Abstract]
- #7 "pre-operative"[Title/Abstract]
- #8 postoperative[Title/Abstract]
- #9 "post-operative"[Title/Abstract]
- #10 "pre-surgery"[Title/Abstract]
- #11 "peri-surgery"[Title/Abstract]
- #12 "post-surgery"[Title/Abstract]
- #13 intraoperative[Title/Abstract]
- #14 "intra-operative"[Title/Abstract]
- #15 surgical[Title/Abstract]
- #16 OR/#1-15
- #17 "Diabetes Mellitus"[Mesh]
- #18 diabet\*[Title/Abstract]
- #19 IDDM[Title/Abstract]
- #20 NIDDM[Title/Abstract]
- #21 MODY[Title/Abstract]
- #22 T2DM[Title/Abstract]
- #23 T2D[Title/Abstract]
- #24 T1DM[Title/Abstract]
- #25 T1D[Title/Abstract]
- #26 OR/#17-25
- #27 "Meta-Analysis" [Publication Type]
- #28 "Meta-Analysis as Topic"[Mesh]
- #29 "systematic review"[Title/Abstract]
- #30 "meta analysis"[Title/Abstract]
- #31 "meta-analysis"[Title/Abstract]
- #32 "meta analyses"[Title/Abstract]
- #33 "meta-analyses"[Title/Abstract]
- #34 OR/#27-33
- #35 #16 AND #26 AND #34

### EMBASE (N=1152)

- #1 'perioperative period'/exp
- #2 'perioperative nursing'/exp
- #3 'surgery'/exp
- #4 perioperative:ab,ti

- #5 'peri-operative':ab,ti
- #6 preoperative:ab,ti
- #7 'pre-operative':ab,ti
- #8 postoperative:ab,ti
- #9 'post-operative':ab,ti
- #10 'pre-surgery':ab,ti
- #11 'peri-surgery':ab,ti
- #12 'post-surgery':ab,ti
- #13 intraoperative:ab,ti
- #14 'intra-operative':ab,ti
- #15 surgical:ab,ti
- #16 OR/#1-15
- #17 'diabetes mellitus'/exp
- #18 diabet\*:ab,ti
- #19 IDDM:ab,ti
- #20 NIDDM:ab,ti
- #21 MODY:ab,ti
- #22 T2DM:ab,ti
- #23 T2D:ab,ti
- #24 T1DM:ab,ti
- #25 T1D:ab,ti
- #26 OR/#17-25
- #27 'meta analysis'/exp
- #28 'systematic review':ab,ti
- #29 'meta analysis':ab,ti
- #30 'meta-analysis':ab,ti
- #31 'meta analyses':ab,ti
- #32 'meta-analyses':ab,ti
- #33 OR/#27-32
- #34 #16 AND #26 AND #33
- #35 #34 AND [medline]/lim
- #36 #34 NOT #35

**Epistemonikos (N=373)**

- #1 perioperative[Title/Abstract]
- #2 "peri-operative" [Title/Abstract]
- #3 preoperative[Title/Abstract]
- #4 "pre-operative"[Title/Abstract]
- #5 postoperative[Title/Abstract]
- #6 "post-operative"[Title/Abstract]
- #7 "pre-surgery"[Title/Abstract]
- #8 "peri-surgery"[Title/Abstract]
- #9 "post-surgery"[Title/Abstract]
- #10 intraoperative[Title/Abstract]

- #11 "intra-operative"[Title/Abstract]
- #12 surgical[Title/Abstract]
- #13 OR/#1-12
- #14 diabet\*[Title/Abstract]
- #15 IDDM[Title/Abstract]
- #16 NIDDM[Title/Abstract]
- #17 MODY[Title/Abstract]
- #18 T2DM[Title/Abstract]
- #19 T2D[Title/Abstract]
- #20 T1DM[Title/Abstract]
- #21 T1D[Title/Abstract]
- #22 OR/#14-21
- #23 #13 AND #22
- #24 #23 AND limit [systematic review]

**Web of Science (N=503)**

- #1 TOPIC:perioperative
- #2 TOPIC:"peri-operative"
- #3 TOPIC:preoperative
- #4 TOPIC:"pre-operative"
- #5 TOPIC:postoperative
- #6 TOPIC:"post-operative"
- #7 TOPIC:"pre-surgery"
- #8 TOPIC:"peri-surgery"
- #9 TOPIC:"post-surgery"
- #10 TOPIC:intraoperative
- #11 TOPIC:"intra-operative"
- #12 TOPIC:surgical
- #13 OR/#1-12
- #14 TOPIC:diabet\*
- #15 TOPIC:IDDM
- #16 TOPIC:NIDDM
- #17 TOPIC:MODY
- #18 TOPIC:T2DM
- #19 TOPIC:T2D
- #20 TOPIC:T1DM
- #21 TOPIC:T1D
- #22 OR/#14-21
- #23 TOPIC:"systematic review"
- #24 TOPIC:"meta analysis"
- #25 TOPIC:"meta-analysis"
- #26 TOPIC:"meta analyses"
- #27 TOPIC:"meta-analyses"
- #28 OR/#23-27

#30 #13 AND #22 AND #28

### **Cochrane Library (N=86)**

- #1 MeSH descriptor: [Surgical Procedures, Operative] explode all trees
- #2 perioperative:ti,ab,kw
- #3 "peri-operative":ti,ab,kw
- #4 preoperative:ti,ab,kw
- #5 "pre-operative":ti,ab,kw
- #6 postoperative:ti,ab,kw
- #7 "post-operative":ti,ab,kw
- #8 "pre-surgery":ti,ab,kw
- #9 "peri-surgery":ti,ab,kw
- #10 "post-surgery":ti,ab,kw
- #11 intraoperative:ti,ab,kw
- #12 "intra-operative":ti,ab,kw
- #13 surgical:ti,ab,kw
- #14 OR/#1-13
- #15 MeSH descriptor: [Diabetes Mellitus] explode all trees
- #16 diabet\*:ti,ab,kw
- #17 IDDM:ti,ab,kw
- #18 NIDDM:ti,ab,kw
- #19 MODY:ti,ab,kw
- #20 T2DM:ti,ab,kw
- #21 T2D:ti,ab,kw
- #22 T1DM:ti,ab,kw
- #23 T1D:ti,ab,kw
- #24 OR/#15-23
- #25 #14 AND #24
- #26 #25 AND limit [Cochrane Review]

### **CBM (N=125)**

- #1 主题词:手术期间/全部树/全部副主题词
- #2 主题词:手术中并发症/全部树/全部副主题词
- #3 主题词:围手术期护理/全部树/全部副主题词
- #4 主题词:围手术期医护/全部树/全部副主题词
- #5 缺省[智能]:手术
- #6 缺省[智能]:围术期
- #7 缺省[智能]:术前
- #8 缺省[智能]:术中
- #9 缺省[智能]:术后
- #10 or/#1-9
- #11 主题词:糖尿病/全部树/全部副主题词
- #12 缺省[智能]:糖尿病
- #13 or/#11-12

- #14 主题词:Meta 分析/全部树/全部副主题词
- #15 主题词:Meta 分析(主题)/全部树/全部副主题词
- #16 缺省[智能]:meta
- #17 缺省[智能]:系统评价
- #18 缺省[智能]:系统综述
- #19 缺省[智能]:荟萃分析
- #20 or/#14-19
- #21 #10 and #13 and #20

#### **CNKI (N=114)**

- #1 主题=手术
- #2 主题=围术期
- #3 主题=术前
- #4 主题=术中
- #5 主题=术后
- #6 or/#1-5
- #7 主题=糖尿病
- #8 主题=meta
- #9 主题=系统评价
- #10 主题=系统综述
- #11 主题=荟萃分析
- #12 or/#8-11
- #13 #6 and #7 and #12

#### **万方 (N=271)**

- #1 主题:手术
- #2 主题:围术期
- #3 主题:术前
- #4 主题:术中
- #5 主题:术后
- #6 or/#1-5
- #7 主题:糖尿病
- #8 主题: meta
- #9 主题:系统评价
- #10 主题:系统综述
- #11 主题:荟萃分析
- #12 or/#8-11
- #13 #6 and #7 and #12
