# Supplementary material for: Quality Assessment of Systematic Review of the Bariatric Surgery for Diabetes Mellitus
Source: Hindawi journal article supplement (doi:10.1155/2019/9541638), 2019-11-21
Supplement: f3 [file 9541638.f3.pdf]

*Additional file 3: Characteristics of included studies*

| Title                                                                                                                                      | Publication year | Journal                                  | language | No. of authors | Country        | Style of included studies                                                                              | No. of included studies | Simple size |
|--------------------------------------------------------------------------------------------------------------------------------------------|------------------|------------------------------------------|----------|----------------|----------------|--------------------------------------------------------------------------------------------------------|-------------------------|-------------|
| Obesity, bariatric surgery and type 2 diabetes – a systematic review                                                                       | 2004             | Diabetes/Metabolism Research and Reviews | English  | 2              | USA            | RCT                                                                                                    | --*                     | --*         |
| The Comparative Effects of Bariatric Surgery on Weight and Type 2 Diabetes                                                                 | 2007             | Obesity Surgery                          | English  | 4              | France         | 2 meta-analyses, 21 primary studies                                                                    | 23                      | --**        |
| Weight and Type 2 Diabetes after Bariatric Surgery: Systematic Review and Meta-analysis                                                    | 2009             | The American Journal of Medicine         | English  | 8              | USA            | 29 RCTs, 49 nRCT PSs, 60 comparative RSs, 187 uncontrolled CSs PSs, 266 single-arm RSs, 25 OSs, 2 CCSs | 621                     | 135246      |
| Metabolic Surgery for the Treatment of Type 2 Diabetes in Patients with BMI <35 kg/m <sup>2</sup> : An Integrative Review of Early Studies | 2010             | Obesity Surgery                          | English  | 6              | Czech Republic | prospective OS                                                                                         | 16                      | 343         |
| Sleeve gastrectomy and type 2 diabetes mellitus: a systematic review                                                                       | 2010             | Surgery for Obesity and Related Diseases | English  | 5              | Canada         | 3 prospective nonRCTs, 3 retrospective controlled trials,                                              | 27                      | 673         |

|                                                                                                                |      |                                   |         |    |             |                                                                     |    |            |
|----------------------------------------------------------------------------------------------------------------|------|-----------------------------------|---------|----|-------------|---------------------------------------------------------------------|----|------------|
|                                                                                                                |      |                                   |         |    |             | 15 prospective CSs, 6 retrospective CSs                             |    |            |
| Bariatric Surgery as a Novel Treatment for Type 2 Diabetes Mellitus: A Systematic Review                       | 2011 | Archives of Surgery               | English | 6  | Netherlands | 1 RCT, 8 OSs                                                        | 9  | 82988      |
| Effectiveness of surgical weight loss on the remission of type 2 diabetes mellitus: A systematic review        | 2011 | JBIC Library of systematic review | English | 2  | Australia   | RCT                                                                 | 5  | not report |
| Ethnic Differences in Weight Loss and Diabetes Remission After Bariatric Surgery: A meta-analysis              | 2012 | Diabetes Care                     | English | 6  | Netherlands | 9 prospective OSs, 5 ROSs                                           | 14 | 3801       |
| Impact of laparoscopic adjustable gastric banding on type 2 diabetes                                           | 2012 | Obesity Reviews                   | English | 4  | Australia   | 23 CSs, 4 nonrandomized CCSs, 6 RCTs, 2 retrospective data analysis | 35 | 1264       |
| Metabolic effects of bariatric surgery in type 2 diabetic patients with body mass index < 35 kg/m <sup>2</sup> | 2012 | Diabetes, Obesity and Metabolism  | English | 14 | China       | 2 RSs, 11 PSs                                                       | 13 | 357        |

|                                                                                                                                                                                          |      |                                                   |         |   |                |                                                                            |    |      |
|------------------------------------------------------------------------------------------------------------------------------------------------------------------------------------------|------|---------------------------------------------------|---------|---|----------------|----------------------------------------------------------------------------|----|------|
| [A SYSTEMATIC REVIEW AND META-ANALYSIS OF BARIATRIC SURGERY ON THE TREATMENT OF TYPE 2 DIABETES MELLITUS]                                                                                | 2012 | Southeast University<br>-academic dissertation    | China   | 1 | China          | RCT; nonRCT;<br>retrospective<br>case serie;<br>prospective<br>case series | 28 | 695  |
| Laparoscopic sleeve gastrectomy and Roux-en-Y gastro-intestinal bypass for the treatment of type 2 diabetes: a Meta-analysis of prospective research                                     | 2012 | LINGNAN MODERN<br>CLINICS IN<br>SURGERY           | China   | 4 | China          | 2 RCTs, 4<br>prospective<br>cohort studies                                 | 6  | 464  |
| [One-Year Postoperative Effects of Gastric Bypass on Type 2 Diabetes in Mainland China: A Meta-Analysis]                                                                                 | 2012 | Chinese Journal of<br>Evidence-Based<br>Medicine  | China   | 6 | China          | BAS                                                                        | 6  | 131  |
| Bariatric Surgery for Weight Loss and Glycemic Control in Nonmorbidly Obese Adults With Diabetes: A Systematic Review                                                                    | 2013 | JAMA                                              | English | 8 | USA            | RCT                                                                        | 3  | 290  |
| Comparison of laparoscopic Roux-en-Y gastric bypass with laparoscopic sleeve gastrectomy for morbid obesity or type 2 diabetes mellitus: a meta-analysis of randomized controlled trials | 2013 | The Journal of the<br>Canadian Chiropractic       | English | 4 | China          | RCTs                                                                       | 5  | 396  |
| Gastric Bypass and Sleeve Gastrectomy for Type 2 Diabetes:A Systematic Review and Meta-analysis of Outcomes                                                                              | 2013 | Obesity Surgery                                   | English | 3 | New<br>Zealand | 21 PSs (3<br>RCTs), 12 RSs                                                 | 33 | 1375 |
| Role of Bariatric Surgery as Treatment for Type 2 Diabetes in Patients Who Do Not Meet Current NIH Criteria: A Systematic Review and Meta-Analysis                                       | 2013 | Journal of the<br>American College of<br>Surgeons | English | 9 | USA            | 22 PSs (3<br>RCTs) , 17 RSs                                                | 39 | 1389 |

|                                                                                                                                                                      |      |                                                                |         |   |       |                               |    |      |
|----------------------------------------------------------------------------------------------------------------------------------------------------------------------|------|----------------------------------------------------------------|---------|---|-------|-------------------------------|----|------|
| The Effects of Bariatric Procedures versus Medical Therapy for Obese Patients with Type 2 Diabetes: Meta-Analysis of Randomized Controlled Trials                    | 2013 | BioMed Research International                                  | English | 6 | China | RCT                           | 3  | 270  |
| [Bariatric Surgery versus Conventional Medical Therapy for Obese Patients with Type 2 Diabetes: A Meta-Analysis]                                                     | 2013 | Chinese Journal of Evidence-Based Medicine                     | China   | 5 | China | RCT                           | 3  | 340  |
| [Efficacies of sleeve gastrectomy and Roux-en-Y gastric bypass for the treatment of type 2 diabetes mellitus: a Meta-analysis]                                       | 2013 | Chinese Journal of Digestive Surgery                           | China   | 6 | China | RCT                           | 5  | 348  |
| [Bariatric surgery for non-obese type 2 diabetes mellitus in Mainland China:A meta-analysis]                                                                         | 2013 | Journal of Clinical Rehabilitative Tissue Engineering Research | China   | 9 | China | BAS                           | 7  | 307  |
| [Bariatric Surgery for Obese Type 2 Diabetes Patients in Mainland China: A Systematic Review]                                                                        | 2013 | Chinese Journal of Evidence-Based Medicine                     | China   | 7 | China | BAS                           | 6  | 100  |
| [Hypoglycemic effects of three types of gastrointestinal reconstruction on type 2 diabetes mellitus : a meta-analysis]                                               | 2014 | Medical Journal of the Chinese People's Armed Police Forces    | China   | 5 | China | 1 RCT, 1 quasi RCT, 5 nonRCTs | 7  | 378  |
| A Meta-analysis of 2-Year Effect After Surgery:Laparoscopic Roux-en-Y Gastric Bypass Versus Laparoscopic Sleeve Gastrectomy for Morbid Obesity and Diabetes Mellitus | 2014 | Obesity Surgery                                                | English | 4 | China | 1 RCT, 11 PCTs, 4 ROSs        | 16 | 9756 |
| Correlation between Postoperative Weight Loss and Diabetes Mellitus Remission: A                                                                                     | 2014 | Obesity Surgery                                                | English | 4 | China | RCTs                          | 8  | 1247 |

|                                                                                                                                                                 |      |                                                          |         |   |           |                                                                      |    |      |
|-----------------------------------------------------------------------------------------------------------------------------------------------------------------|------|----------------------------------------------------------|---------|---|-----------|----------------------------------------------------------------------|----|------|
| Meta-Analysis                                                                                                                                                   |      |                                                          |         |   |           |                                                                      |    |      |
| Diabetes and Weight in Comparative Studies of Bariatric Surgery vs Conventional Medical Therapy: A Systematic Review and Meta-Analysis                          | 2014 | Obesity Surgery                                          | English | 3 | Germany   | 5 RCTs, 11 nonRCTs                                                   | 16 | 6131 |
| Early Impact of Bariatric Surgery on Type II Diabetes,Hypertension, and Hyperlipidemia: A Systematic Review,Meta-Analysis and Meta-Regression on 6,587 Patients | 2014 | Obesity Surgery                                          | English | 5 | Germany   | RCT                                                                  | 19 | 6587 |
| Efficacy of Metabolic Surgery on HbA1c Decrease in Type 2 Diabetes Mellitus Patients with BMI <35 kg/m <sup>2</sup> —a Review                                   | 2014 | Obesity Surgery                                          | English | 4 | Singapore | 4 RCTs, 36 prospective observational or uncontrolled studies, 13 RSs | 53 | 2258 |
| Impact of roux-en Y gastric bypass surgery on prognostic factors of type 2 diabetes mellitus: meta-analysis and systematic review                               | 2014 | Diabetes/Metabolism Research and Reviews                 | English | 6 | China     | not report                                                           | 10 | 924  |
| The Duodenal–Jejunal Bypass Liner for the Treatment of Type 2 Diabetes Mellitus and/or Obesity: a Systematic Review                                             | 2014 | Obesity Surgery                                          | English | 3 | Austria   | 6 CSs, 3 RCTs, 1 non-RCT                                             | 10 | 342  |
| [Short- and long-term remission of obese type 2 diabetes mellitus after gastric bypass surgery or sleeve gastrectomy: a Meta analysis]                          | 2014 | Chinese Archives of General Surgery (Electronic Edition) | China   | 4 | China     | RCT                                                                  | 34 | 2490 |
| A Meta-Analysis of Short-Term Outcomes of Patients with Type 2 Diabetes Mellitus and BMI                                                                        | 2015 | World Journal of Surgery                                 | English | 5 | China     | PS                                                                   | 9  | 343  |

|                                                                                                                                                              |      |                                          |         |    |         |                                                  |    |       |
|--------------------------------------------------------------------------------------------------------------------------------------------------------------|------|------------------------------------------|---------|----|---------|--------------------------------------------------|----|-------|
| £35 kg/m2 Undergoing Roux-en-Y Gastric Bypass                                                                                                                |      |                                          |         |    |         |                                                  |    |       |
| A systematic review and meta-analysis of the effect of Billroth reconstruction on type 2 diabetes: A new perspective on old surgical methods                 | 2015 | Surgery for Obesity and Related Diseases | English | 6  | Korea   | RCS                                              | 8  | 972   |
| Bariatric Surgery for Type 2 Diabetes Mellitus in Patients with BMI <30 kg/m2: A Systematic Review and Meta-Analysis                                         | 2015 | PLOS ONE                                 | English | 5  | China   | PS                                               | 10 | 290   |
| Effect of sleeve gastrectomy on type 2 diabetes as an alternative treatment modality to Roux-en-Y gastric bypass: systemic review and meta-analysis          | 2015 | Surgery for Obesity and Related Diseases | English | 6  | Korea   | 3 retrospective clinical studies, 6 PCSs, 2 RCTs | 11 | 857   |
| Efficacy of Laparoscopic Mini Gastric Bypass for Obesity and Type 2 Diabetes Mellitus: A Systematic Review and Meta-Analysis                                 | 2015 | Gastroenterology Research and Practice   | English | 8  | China   | RCT                                              | 31 | 17061 |
| Laparoscopic Roux-en-Y Gastric Bypass versus Sleeve Gastrectomy for Obese Patients with Type 2 Diabetes: A Meta-analysis of Randomized Controlled Trials     | 2015 | The American Journal of Surgery          | English | 6  | China   | RCT                                              | 4  | 256   |
| Long-Term Effects of Bariatric Surgery on Type II Diabetes, Hypertension and Hyperlipidemia: A Meta-Analysis and Meta-Regression Study with 5-Year Follow-Up | 2015 | Obesity Surgery                          | English | 6  | Germany | prospective cohort study                         | 22 | 4160  |
| Predictive Factors of Type 2 Diabetes Mellitus Remission Following Bariatric Surgery: a                                                                      | 2015 | Obesity Surgery                          | English | 11 | China   | 9 RSs, 5 PSs, 1 OS                               | 15 | 1753  |

|                                                                                                                                                             |      |                                   |         |    |             |                                                                                                                     |    |       |
|-------------------------------------------------------------------------------------------------------------------------------------------------------------|------|-----------------------------------|---------|----|-------------|---------------------------------------------------------------------------------------------------------------------|----|-------|
| Meta-analysis                                                                                                                                               |      |                                   |         |    |             |                                                                                                                     |    |       |
| Predictors of Remission of Diabetes Mellitus in Severely Obese Individuals Undergoing Bariatric Surgery: Do BMI or Procedure Choice Matter? A Meta-analysis | 2015 | Annals of Surgery                 | English | 4  | Italy       | 6 RCTs, 51 nonRCTs, 4 nonRCTs, 4 controlled OSs, 26 non controlled OSs, 2 controlled studies, 1 comprehensive study | 94 | 94579 |
| Surgical Versus Medical Treatment of Type 2 Diabetes Mellitus in Nonseverely Obese Patients: A Systematic Review and Meta-analysis                          | 2015 | Annals of Surgery                 | English | 11 | Switzerland | 6 observational clinical studies, 5 RCTs                                                                            | 11 | 706   |
| The Impact of Bariatric Surgery on Diabetic Retinopathy: A Systematic Review and Meta-Analysis                                                              | 2015 | Obesity Surgery                   | English | 6  | Canada      | non-randomized CS                                                                                                   | 4  | 148   |
| The Long-Term Effects of Bariatric Surgery for Type 2 Diabetes: Systematic Review and Meta-analysis of Randomized and Non-randomized Evidence               | 2015 | Obesity Surgery                   | English | 7  | China       | 2 RCTs, 24 cohort studies                                                                                           | 26 | 7883  |
| Type 1 Diabetes Mellitus and Bariatric Surgery: A Systematic Review and Meta-Analysis                                                                       | 2015 | Obesity Surgery                   | English | 8  | UK          | 6 CPs, 22 CSs                                                                                                       | 28 | 148   |
| [Laparoscopic Roux-en-Y Gastric Bypass versus Laparoscopic Sleeve Gastrectomy for Obesity and                                                               | 2015 | Chinese Journal of Evidence-Based | China   | 7  | China       | RCT                                                                                                                 | 8  | 828   |

|                                                                                                                                    |      |                                                         |         |   |        |                                                                             |    |       |
|------------------------------------------------------------------------------------------------------------------------------------|------|---------------------------------------------------------|---------|---|--------|-----------------------------------------------------------------------------|----|-------|
| Type 2 Diabetes Mellitus: A Meta-analysis]                                                                                         |      | Medicine                                                |         |   |        |                                                                             |    |       |
| [Short-Term Efficacy of Laparoscopic Sleeve Gastrectomy for Obesity with Type 2 Diabetes Mellitus in China: A Systematic Analysis] | 2015 | Chinese Journal of Bases and Clinics in General Surgery | China   | 4 | China  | CSs                                                                         | 7  | 107   |
| Bariatric Surgery in Type 1 Diabetes Mellitus: A Systematic Review                                                                 | 2016 | Obesity Surgery                                         | English | 6 | UK     | 3 retrospective Comparative studies, 8 CSs, 4 CPs                           | 15 | 68    |
| [A META-ANALYSIS OF SLEEVE GASTRECTOMY VERSUS ROUX-EN-Y GASTRIC BYPASS FOR MORBID OBESITY AND DIABETES MELLITUS]                   | 2016 | Journal of Inner Mongolia Medical University            | China   | 7 | China  | RCT                                                                         | 9  | 713   |
| [Three types of gastrointestinal reconstruction on non-obese type 2 diabetes mellitus: a meta-analysis]                            | 2017 | Anhui Medical Journal                                   | China   | 3 | China  | observational studies (8)                                                   | 20 | 956   |
| A Systematic Review and Meta-Analysis of Outcomes for Type 1 Diabetes after Bariatric Surgery                                      | 2016 | Journal of Obesity                                      | English | 8 | Canada | 11 CSs , 2CPs                                                               | 13 | 86    |
| Bariatric surgery and diabetic retinopathy_ a systematic review and meta-analysis of controlled clinical studies                   | 2017 | obesity reviews                                         | English | 4 | Italy  | retrospective cohort study、 randomized controlled trial、 case-control study | 7  | 16651 |



|                                                                                                                                                                    |      |                                          |         |   |        |                                                                                                                                                                 |    |       |
|--------------------------------------------------------------------------------------------------------------------------------------------------------------------|------|------------------------------------------|---------|---|--------|-----------------------------------------------------------------------------------------------------------------------------------------------------------------|----|-------|
| Bariatric surgery is associated with less progression of diabetic retinopathyA systematic review and metaanalysis                                                  | 2016 | Surgery for Obesity and Related Diseases | English | 6 | Korea  | six retrospective observational case series, two retrospective case-control studies, two prospective case-control studies, and two randomized controlled trials | 12 | 876   |
| Bariatric surgery reduces urinary albumin excretion in diabetic nephropathy_ a systematic review and meta-analysis                                                 | 2016 | Surgery for Obesity and Related Diseases | English | 5 | USA    |                                                                                                                                                                 | 15 | 1839  |
| Impact of bariatric surgery on renal functions in patients with type 2 diabetes mellitus systematic review of randomized trials and observational studies          | 2016 | Surgery for Obesity and Related Diseases | English | 6 | China  | 4 RCTs, 5 cohort studies, 20 BASs                                                                                                                               | 29 | 18172 |
| Meta-analysis of bariatric surgery versus non-surgical treatment for type 2 diabetes mellitus                                                                      | 2016 | Oncotarget                               | English | 8 | China  | RCT                                                                                                                                                             | 8  | 619   |
| Preoperative Fasting Plasma C-Peptide Levels as Predictors of Remission of Type 2 Diabetes Mellitus after Bariatric Surgery: A Systematic Review and Meta-Analysis | 2016 | Journal of Investigative Surgery         | English | 4 | China  | 6PS、 8ROS                                                                                                                                                       | 14 | 991   |
| Roux-En-Y Gastric Bypass in Type 2 Diabetes                                                                                                                        | 2017 | Obesity Surgery                          | English | 5 | Brazil | RCT                                                                                                                                                             | 5  | 342   |

|                                                                                                                                                                         |      |                                                 |         |    |        |                   |    |      |
|-------------------------------------------------------------------------------------------------------------------------------------------------------------------------|------|-------------------------------------------------|---------|----|--------|-------------------|----|------|
| Patients with Mild Obesity_ a Systematic Review and Meta-analysis                                                                                                       |      |                                                 |         |    |        |                   |    |      |
| Roux-en-Y Gastric Bypass Versus Medical Treatment for Type 2 Diabetes Mellitus in Obese Patients_ A Systematic Review and Meta-Analysis of Randomized Controlled Trials | 2016 | Medicine                                        | English | 10 | China  | RCT               | 6  | 410  |
| Sleeve Gastrectomy and Type 2 Diabetes Mellitus_ a Systematic Review of Long-Term Outcomes                                                                              | 2016 | Obesity Surgery                                 | English | 6  | Canada | 10CSs, with 1RCT. | 11 | 1354 |
| Type 1 Diabetes Mellitus and Bariatric Surgery_ A Systematic Review and Meta-Analysis                                                                                   | 2016 | Obesity Surgery                                 | English | 8  | UK     | CS ,CP            | 28 | 142  |
| [Meta-analysis of traditional treatment and weight loss surgery in the clinical treatment of obese type 2 diabetes patients]                                            | 2016 | Yiayao Qianyan                                  | China   | 2  | China  | not mentionrd     | 30 | -- * |
| [A Meta-analysis of therapeutic effect and related complications of laparoscopic sleeve gastrectomy and laparoscopic Roux-en-Y gastric bypass]                          | 2016 | Academic dissertation-Lanzhou University        | China   | 1  | China  | RCT               | 15 | 4037 |
| [The Short-Term Effect Analysis of Laparoscopic Sleeve Gastrectomy and Laparoscopic gastric bypass for obesity and type 2 diabetes (T2DM) in China]                     | 2016 | Academic dissertation- Hebei Medical University | China   | 1  | China  | RCT               | 10 | -- * |
| [Comparative on clinical effect and cost-effectiveness Bariatric Surger for patients with type 2 Diabetes Mellitus]                                                     | 2017 | Academic dissertation- Shandong University      | China   | 1  | China  | 3RCT、2RCS         | 5  | 1087 |

RCT: randomized controlled trial, PCT: parallel controlled trial, ROS: retrospective observational study, PS: prospective study, RCS: retrospective cohort study, OS: observational study, CS: case serie, CP: case report, PCS: prospective clinical study, RS: retrospective study, CCS: case-control study, BAS: before-after study in the same patient.

\* : The SR described the results qualitatively, which did not report this data. \* \* : This study was a comprehensive review which included meta-analysis and original study as they were relevant to the topic. In this review, the results were described qualitatively, which did not report this data.
