# Supplementary material for: Quality Assessment of Systematic Review of the Bariatric Surgery for Diabetes Mellitus
Source: Hindawi journal article supplement (doi:10.1155/2019/9541638), 2019-11-21
Supplement: f4 [file 9541638.f4.pdf]

## Additional file 4: quality assessment of each study

| No | Title                                                                                                                                      | Item 01- Was an ‘‘a priori’’ design provided? | Item 02- Was there duplicate study selection and data extraction? | Item 03- Was a comprehensive literature search performed? | Item 04- Was the status of publication (i.e., grey literature) used as an inclusion criterion? | Item 05- Was a list of studies (included and excluded) provided? | Item 06- Were the characteristics of the included studies provided? | Item 07- Was the scientific quality of the included studies assessed and documented? | Item 08- Was the scientific quality of the included studies used appropriately in formulating conclusions? | Item 09- Were the methods used to combine the findings of studies appropriate? | Item 10- Was the likelihood of publication bias assessed? | Item 11- Were potential conflicts of interest included? | Total |
|----|--------------------------------------------------------------------------------------------------------------------------------------------|-----------------------------------------------|-------------------------------------------------------------------|-----------------------------------------------------------|------------------------------------------------------------------------------------------------|------------------------------------------------------------------|---------------------------------------------------------------------|--------------------------------------------------------------------------------------|------------------------------------------------------------------------------------------------------------|--------------------------------------------------------------------------------|-----------------------------------------------------------|---------------------------------------------------------|-------|
| 1  | Obesity, bariatric surgery and type 2 diabetes – a systematic review                                                                       | no                                            | can't answer                                                      | no                                                        | no                                                                                             | no                                                               | no                                                                  | can't answer                                                                         | yes                                                                                                        | can't answer                                                                   | can't answer                                              | no                                                      | 1     |
| 2  | The Comparative Effects of Bariatric Surgery on Weight and Type 2 Diabetes                                                                 | no                                            | can't answer                                                      | no                                                        | no                                                                                             | no                                                               | no                                                                  | can't answer                                                                         | yes                                                                                                        | can't answer                                                                   | can't answer                                              | no                                                      | 1     |
| 3  | Weight and Type 2 Diabetes after Bariatric Surgery: Systematic Review and Meta-analysis                                                    | no                                            | yes                                                               | yes                                                       | no                                                                                             | no                                                               | yes                                                                 | yes                                                                                  | yes                                                                                                        | yes                                                                            | can't answer                                              | yes                                                     | 7     |
| 4  | Metabolic Surgery for the Treatment of Type 2 Diabetes in Patients with BMI <35 kg/m <sup>2</sup> : An Integrative Review of Early Studies | no                                            | yes                                                               | yes                                                       | no                                                                                             | yes                                                              | yes                                                                 | can't answer                                                                         | yes                                                                                                        | yes                                                                            | can't answer                                              | no                                                      | 6     |

|    |                                                                                                                                                      |    |     |     |     |     |     |              |     |              |              |     |   |
|----|------------------------------------------------------------------------------------------------------------------------------------------------------|----|-----|-----|-----|-----|-----|--------------|-----|--------------|--------------|-----|---|
| 5  | Sleeve gastrectomy and type 2 diabetes mellitus: a systematic review                                                                                 | no | yes | yes | yes | yes | yes | can't answer | yes | can't answer | can't answer | yes | 7 |
| 6  | Bariatric Surgery as a Novel Treatment for Type 2 Diabetes Mellitus: A Systematic Review                                                             | no | yes | no  | no  | yes | yes | can't answer | yes | can't answer | can't answer | yes | 5 |
| 7  | Effectiveness of surgical weight loss on the remission of type 2 diabetes mellitus: A systematic review                                              | no | yes | yes | yes | yes | no  | yes          | yes | can't answer | can't answer | no  | 6 |
| 8  | Ethnic Differences in Weight Loss and Diabetes Remission After Bariatric Surgery: A meta-analysis                                                    | no | yes | yes | no  | yes | yes | yes          | yes | yes          | yes          | yes | 9 |
| 9  | Impact of laparoscopic adjustable gastric banding on type 2 diabetes                                                                                 | no | yes | yes | no  | yes | yes | yes          | yes | yes          | can't answer | no  | 7 |
| 10 | Metabolic effects of bariatric surgery in type 2 diabetic patients with body mass index < 35 kg/m2                                                   | no | yes | yes | no  | yes | yes | can't answer | yes | yes          | can't answer | yes | 7 |
| 11 | [A SYSTEMATIC REVIEW AND META-ANALYSIS OF BARIATRIC SURGERY ON THE TREATMENT OF TYPE 2 DIABETES MELLITUS]                                            | no | yes | yes | no  | yes | yes | yes          | yes | yes          | yes          | no  | 8 |
| 12 | Laparoscopic sleeve gastrectomy and Roux-en-Y gastro-intestinal bypass for the treatment of type 2 diabetes: a Meta-analysis of prospective research | no | yes | yes | no  | yes | yes | yes          | yes | yes          | can't answer | no  | 7 |

|    |                                                                                                                                                                                          |     |              |     |    |     |     |              |     |     |              |     |   |
|----|------------------------------------------------------------------------------------------------------------------------------------------------------------------------------------------|-----|--------------|-----|----|-----|-----|--------------|-----|-----|--------------|-----|---|
| 13 | [One-Year Postoperative Effects of Gastric Bypass on Type 2 Diabetes in Mainland China: A Meta-Analysis]                                                                                 | no  | yes          | yes | no | yes | yes | yes          | yes | yes | yes          | no  | 8 |
| 14 | Bariatric Surgery for Weight Loss and Glycemic Control in Nonmorbidly Obese Adults With Diabetes: A Systematic Review                                                                    | yes | yes          | yes | no | yes | yes | can't answer | yes | yes | can't answer | yes | 8 |
| 15 | Comparison of laparoscopic Roux-en-Y gastric bypass with laparoscopic sleeve gastrectomy for morbid obesity or type 2 diabetes mellitus: a meta-analysis of randomized controlled trials | no  | yes          | yes | no | yes | yes | yes          | yes | yes | can't answer | no  | 7 |
| 16 | Gastric Bypass and Sleeve Gastrectomy for Type 2 Diabetes:A Systematic Review and Meta-analysis of Outcomes                                                                              | no  | can't answer | yes | no | yes | yes | yes          | yes | yes | can't answer | no  | 6 |
| 17 | Role of Bariatric Surgery as Treatment for Type 2 Diabetes in Patients Who Do Not Meet Current NIH Criteria: A Systematic Review and Meta-Analysis                                       | no  | can't answer | yes | no | no  | yes | can't answer | yes | yes | can't answer | yes | 5 |
| 18 | The Effects of Bariatric Procedures versus Medical Therapy for Obese Patients with Type 2 Diabetes: Meta-Analysis of Randomized Controlled Trials                                        | no  | yes          | yes | no | yes | yes | yes          | yes | yes | can't answer | yes | 8 |



|    |                                                                                                                                                                 |    |              |     |     |     |     |              |     |              |              |     |   |
|----|-----------------------------------------------------------------------------------------------------------------------------------------------------------------|----|--------------|-----|-----|-----|-----|--------------|-----|--------------|--------------|-----|---|
| 26 | Diabetes and Weight in Comparative Studies of Bariatric Surgery vs Conventional Medical Therapy: A Systematic Review and Meta-Analysis                          | no | yes          | yes | no  | yes | yes | yes          | yes | yes          | can't answer | yes | 8 |
| 27 | Early Impact of Bariatric Surgery on Type II Diabetes,Hypertension, and Hyperlipidemia: A Systematic Review,Meta-Analysis and Meta-Regression on 6,587 Patients | no | yes          | yes | no  | yes | yes | can't answer | yes | yes          | yes          | no  | 7 |
| 28 | Efficacy of Metabolic Surgery on HbA1c Decrease in Type 2 Diabetes Mellitus Patients with BMI <35 kg/m2 —a Review                                               | no | can't answer | yes | no  | yes | yes | can't answer | yes | yes          | can't answer | no  | 5 |
| 29 | Impact of roux-en Y gastric bypass surgery on prognostic factors of type 2 diabetes mellitus: meta-analysis and systematic review                               | no | can't answer | yes | no  | yes | yes | can't answer | yes | yes          | yes          | no  | 6 |
| 30 | The Duodenal–Jejunal Bypass Liner for the Treatment of Type 2 Diabetes Mellitus and/or Obesity: a Systematic Review                                             | no | yes          | yes | yes | yes | yes | yes          | yes | can't answer | can't answer | yes | 8 |
| 31 | [Short- and long-term remission of obese type 2 diabetes mellitus after gastric bypass surgery or sleeve gastrectomy: a Meta analysis]                          | no | yes          | yes | no  | yes | yes | yes          | yes | yes          | can't answer | no  | 7 |

|    |                                                                                                                                                          |     |     |     |     |     |     |              |     |     |              |     |    |
|----|----------------------------------------------------------------------------------------------------------------------------------------------------------|-----|-----|-----|-----|-----|-----|--------------|-----|-----|--------------|-----|----|
| 32 | A Meta-Analysis of Short-Term Outcomes of Patients with Type 2 Diabetes Mellitus and BMI $\geq 35$ kg/m <sup>2</sup> Undergoing Roux-en-Y Gastric Bypass | yes | yes | yes | no  | yes | yes | yes          | yes | yes | yes          | yes | 10 |
| 33 | A systematic review and meta-analysis of the effect of Billroth reconstruction on type 2 diabetes: A new perspective on old surgical methods             | no  | yes | yes | no  | yes | yes | yes          | yes | yes | yes          | yes | 9  |
| 34 | Bariatric Surgery for Type 2 Diabetes Mellitus in Patients with BMI $< 30$ kg/m <sup>2</sup> : A Systematic Review and Meta-Analysis                     | no  | yes | yes | yes | yes | yes | yes          | yes | yes | can't answer | yes | 9  |
| 35 | Effect of sleeve gastrectomy on type 2 diabetes as an alternative treatment modality to Roux-en-Y gastric bypass: systemic review and meta-analysis      | no  | yes | yes | no  | yes | yes | yes          | yes | yes | can't answer | no  | 7  |
| 36 | Efficacy of Laparoscopic Mini Gastric Bypass for Obesity and Type 2 Diabetes Mellitus: A Systematic Review and Meta-Analysis                             | no  | yes | yes | no  | yes | yes | can't answer | yes | yes | can't answer | no  | 6  |

|    |                                                                                                                                                             |    |     |     |     |     |     |              |     |     |              |              |     |   |
|----|-------------------------------------------------------------------------------------------------------------------------------------------------------------|----|-----|-----|-----|-----|-----|--------------|-----|-----|--------------|--------------|-----|---|
| 37 | Laparoscopic Roux-en-Y Gastric Bypass versus Sleeve Gastrectomy for Obese Patients with Type 2 Diabetes: A Meta-analysis of Randomized Controlled Trials    | no | yes | yes | yes | yes | yes | yes          | yes | yes | yes          | can't answer | no  | 8 |
| 38 | Long-Term Effects of Bariatric Surgery on Type II Diabetes,Hypertension and Hyperlipidemia: A Meta-Analysis and Meta-Regression Study with 5-Year Follow-Up | no | yes | yes | no  | yes | yes | can't answer | yes | yes | yes          | yes          | no  | 7 |
| 39 | Predictive Factors of Type 2 Diabetes Mellitus Remission Following Bariatric Surgery: a Meta-analysis                                                       | no | yes | yes | no  | yes | yes | yes          | yes | yes | yes          | yes          | yes | 9 |
| 40 | Predictors of Remission of Diabetes Mellitus in Severely Obese Individuals Undergoing Bariatric Surgery: Do BMI or Procedure Choice Matter? A Meta-analysis | no | yes | yes | no  | yes | yes | yes          | yes | yes | yes          | can't answer | yes | 8 |
| 41 | Surgical Versus Medical Treatment of Type 2 Diabetes Mellitus in Nonseverely Obese Patients: A Systematic Review and Meta-analysis                          | no | yes | yes | no  | yes | yes | can't answer | yes | yes | can't answer | yes          | yes | 7 |
| 42 | The Impact of Bariatric Surgery on Diabetic Retinopathy:A Systematic Review and Meta-Analysis                                                               | no | yes | yes | no  | yes | yes | yes          | yes | yes | yes          | can't answer | no  | 7 |







|    |                                                                                                                                                                         |    |              |     |     |     |     |              |     |              |              |     |   |
|----|-------------------------------------------------------------------------------------------------------------------------------------------------------------------------|----|--------------|-----|-----|-----|-----|--------------|-----|--------------|--------------|-----|---|
| 56 | Preoperative Fasting Plasma C-Peptide Levels as Predictors of Remission of Type 2 Diabetes Mellitus after Bariatric Surgery: A Systematic Review and Meta-Analysis      | no | yes          | yes | no  | yes | yes | yes          | yes | yes          | yes          | yes | 9 |
| 57 | Roux-En-Y Gastric Bypass in Type 2 Diabetes Patients with Mild Obesity_ a Systematic Review and Meta-analysis                                                           | no | can't answer | yes | no  | yes | yes | yes          | yes | yes          | yes          | yes | 8 |
| 58 | Roux-en-Y Gastric Bypass Versus Medical Treatment for Type 2 Diabetes Mellitus in Obese Patients_ A Systematic Review and Meta-Analysis of Randomized Controlled Trials | no | yes          | yes | no  | yes | yes | yes          | yes | yes          | yes          | yes | 9 |
| 59 | Sleeve Gastrectomy and Type 2 Diabetes Mellitus_ a Systematic Review of Long-Term Outcomes                                                                              | no | yes          | yes | yes | yes | yes | can't answer | yes | yes          | can't answer | yes | 8 |
| 60 | Type 1 Diabetes Mellitus and Bariatric Surgery_ A Systematic Review and Meta-Analysis                                                                                   | no | can't answer | yes | no  | yes | yes | yes          | yes | yes          | can't answer | yes | 7 |
| 61 | [Meta-analysis of traditional treatment and weight loss surgery in the clinical treatment of obese type 2 diabetes patients]                                            | no | can't answer | yes | no  | yes | no  | yes          | yes | can't answer | can't answer | no  | 4 |

|    |                                                                                                                                                     |    |              |     |     |     |     |     |     |     |     |    |   |
|----|-----------------------------------------------------------------------------------------------------------------------------------------------------|----|--------------|-----|-----|-----|-----|-----|-----|-----|-----|----|---|
| 62 | [A Meta-analysis of therapeutic effect and related complications of laparoscopic sleeve gastrectomy and laparoscopic Roux-en-Y gastric bypass]      | no | yes          | yes | no  | yes | yes | yes | yes | yes | yes | no | 8 |
| 63 | [The Short-Term Effect Analysis of Laparoscopic Sleeve Gastrectomy and Laparoscopic gastric bypass for obesity and type 2 diabetes (T2DM) in China] | no | yes          | yes | yes | yes | yes | yes | yes | yes | yes | no | 9 |
| 64 | [Comparative on clinical effect and cost-effectiveness Bariatric Surger for patients with type 2 Diabetes Mellitus]                                 | no | can't answer | yes | no  | yes | yes | yes | yes | yes | yes | no | 7 |
|    |                                                                                                                                                     | 5  | 51           | 61  | 13  | 60  | 59  | 45  | 64  | 55  | 28  | 31 |   |
